# Supplementary material
Source: Springer Nature journal article supplement (https://www.springermedizin.de/resource/supplementary/12885_2009_1629_MOESM3_ESM.pdf/9472502)
Supplement: MOESM3 [file 9472502]

Emotional well-being

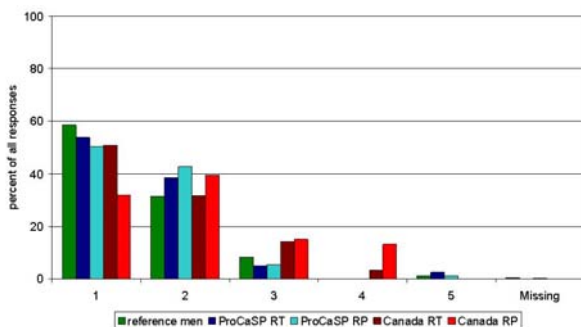

1. Generally happy and free from worry, sadness, or frustration.
2. A little worry, sadness, or frustration.
3. Moderate worry, sadness, or frustration.
4. Quite a bit of worry, sadness, or frustration (*missing in the German questionnaire*)
5. Extreme worry, sadness, or frustration.

Urinary frequency

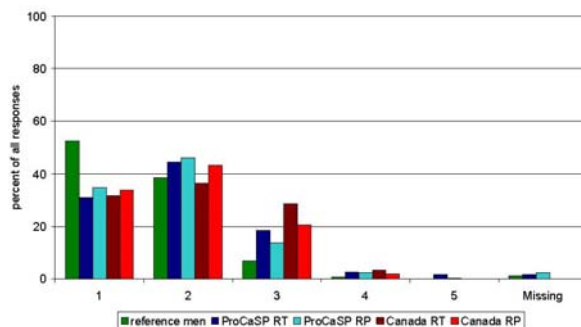

1. No urinary frequency or urgency.
2. A little urinary frequency or urgency, does not interfere with sleep or other activities (for example: work, social); no need to plan ahead.
3. Some urinary frequency or urgency that interferes with sleep or other activities; may need to plan ahead.
4. Quite a bit of urinary frequency or urgency; need to be near a bathroom most of the time.
5. Extreme urinary frequency or urgency; need to be near a bathroom always.

Urinary incontinence

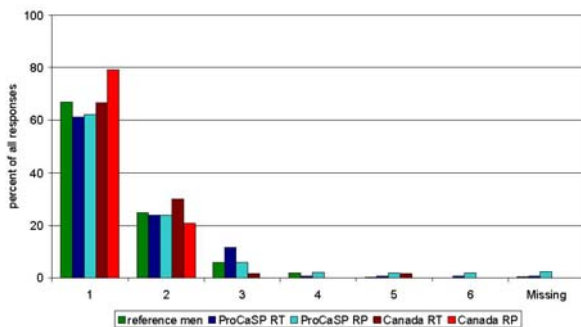

1. Never, under any circumstances leak urine or lose bladder control.
2. On rare occasions, leak urine or lose bladder control, does not interfere with any activities (for example: work, social, sexual, sleep).
3. Occasionally leak urine or lose bladder control, interferes with a few activities.
4. A moderate amount of the time, leak urine or lose bladder control, interferes with some activities.
5. Most of the time, leak urine or have poor bladder control, interferes with many activities.
6. Require a clamp, catheter, or collecting bag because of leaking urine or poor bladder control.

Sexual function

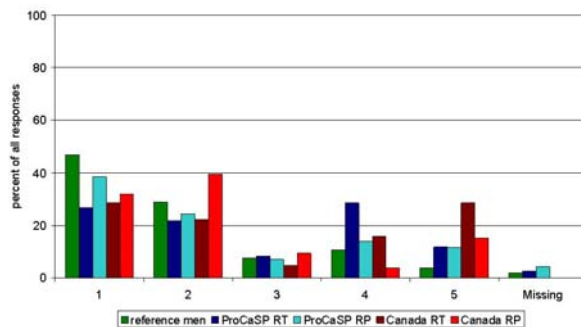

1. Full erections sufficient for intercourse.
2. Erections sufficient for intercourse, but some reduction in firmness.
3. Erections sufficient for masturbation or foreplay only.
4. Erections, but not firm enough for any sexual activity.
5. No erections at all.
